# Supplementary material for: Modelling of a CH4-producing microbial electrosynthesis system for energy recovery and wastewater treatment
Source: Royal Society of Chemistry journal article supplement (doi:10.1039/d1ew00725d), 2022-01-01
Supplement: d1ew00725d1.pdf [file d1ew00725d1.pdf]

## **Modelling of a CH<sub>4</sub>-producing microbial electrosynthesis system for energy recovery and wastewater treatment**

Zhuo Li <sup>1,2,3</sup>, Qian Fu <sup>\*,1,2</sup>, Hao Chen <sup>1,2</sup>, Shuai Xiao <sup>1,2</sup>, Jun Li <sup>1,2</sup>, Xun Zhu <sup>1,2</sup>,

Qiang Liao <sup>1,2</sup>

<sup>1</sup> Key Laboratory of Low-grade Energy Utilization Technologies and Systems,

Chongqing University, Ministry of Education, Chongqing 400044, China

<sup>2</sup> Institute of Engineering Thermophysics, School of Energy and Power Engineering,

Chongqing University, Chongqing 400044, China

<sup>3</sup> Institute for Energy Research, Jiangsu University, Zhenjiang, 212013, China

\* Corresponding authors:

Emails: fuqian@cqu.edu.cn

Tel./fax: +86 23 65102474

## Section 1: experimental operation of CH<sub>4</sub>-producing MESs

A glass bottle with 350 mL was used as the bioreactor for a single-chamber MES, and two carbon clothes (12 cm<sup>2</sup>, TMIL Ltd., Ibaraki, Japan) were used as the anode and cathode, respectively. The distance between the anode and cathode was 2 cm, and the electrodes were connected to a power source (Array 3645 A, Array Electronics, Nanjing, China) by titanium wires. To cultivate the MES, the effluent (100 mL) from a CH<sub>4</sub>-producing MES operated for 6 months and medium (150 mL) were added into the reactor, and the output voltage of the power source was set at 0.82 V. The medium mainly contained 15 mmol L<sup>-1</sup> acetate, 50 mmol L<sup>-1</sup> PBS (19 mmol L<sup>-1</sup> KH<sub>2</sub>PO<sub>3</sub>, 31 mmol L<sup>-1</sup> Na<sub>2</sub>HPO<sub>3</sub>) and other microelements [1]. Before operation, the reactor was flushed by pure N<sub>2</sub> to remove oxygen. The solution in reactor was exchanged by fresh medium when the current density decreased to 0.5 A m<sup>-2</sup>. The gaseous and liquid products were analyzed per day by a gas chromatography and an ion chromatography, respectively according to our previous studies [1-3]. The pH of solution was detected using a pH-meter (PHS-2F, INESA scientific instrument Co., Ltd, Shanghai, China) by extracting 1 mL of the electrolyte from the reactor per day.

## Section 2: operation and electron transfer of a CH<sub>4</sub>-producing MES

A voltage of 0.7 ~ 1.0 V is usually applied to a CH<sub>4</sub>-producing MES. Fig. S1 shows the variation of the current and electrode potential of a MES operated under 0.7 V. As shown in this figure, the cathode potential is kept at ~ -1.15 V vs. Ag/AgCl during the stable operation of the MES, indicating that the cathode potential is always lower than -1.0 V vs. Ag/AgCl during the operation of MESs under typical applied voltages. In this condition, electrons are mainly transferred from cathode surfaces to cathode biofilms through the indirect electron transfer pathway [2].

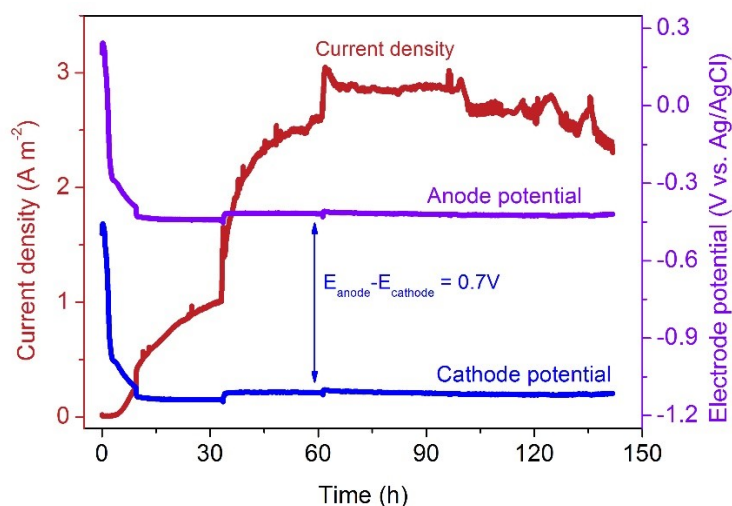

Fig. S1 Variation of the current and electrode potential of a CH<sub>4</sub>-producing MES operated under 0.7 V

### Section 3: kinetics of biocathodes

As shown in Fig. S2, when the biocathode operated at the potential higher than  $-0.8$  V vs. Ag/AgCl, nearly no current was generated on it. When it operated at the potential lower than  $-0.8$  V vs. Ag/AgCl, the generated current was mainly contributed to indirect electron transfer, indicating that  $H_2$  was first generated on the biocathode, and then  $H_2$  was further converted to  $CH_4$  in biofilms or bulk solution [1, 2]. In this case, we used a piecewise function to describe the kinetics current generation with  $-0.8$  V vs. Ag/AgCl as the critical point.

Furthermore, as the conversion of  $H_2$  to  $CH_4$  ( $CO_2 + 4H_2 \rightarrow CH_4 + 2H_2O$ ) was not an electrochemical reaction and methane was the main products observed in our experiments, thus we assumed the conversion of  $H_2$  to  $CH_4$  as a non-limiting step. Therefore, we only considered the electrochemical kinetics of hydrogen generation using the Butler-Volmer-Monod equation.

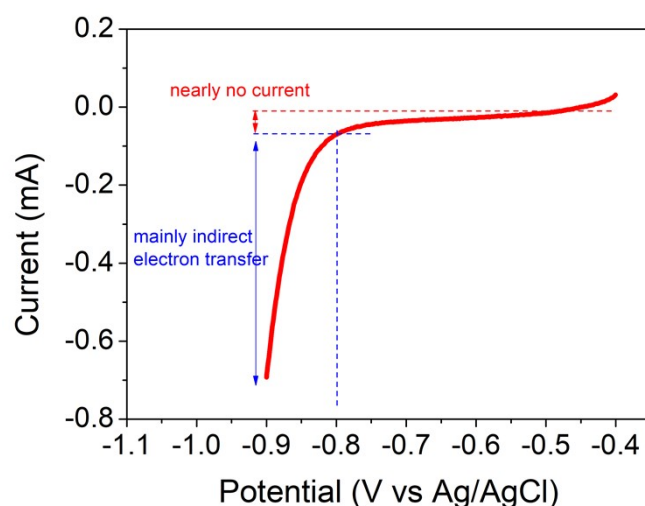

Fig. S2 Current generation of the biocathode under different potentials.

#### Section 4: equation construction of pH factor

The original equations used to illustrate the influence of pH on bioanode activities was illustrated as Eq. S1 [4]:

$$r_{ut} = \begin{cases} 0, & pH < pH_{opt} - W \\ \hat{q}X_f \left( 1 + \cos \left( \frac{\pi}{W} (pH - pH_{opt}) \right) \right), & pH_{opt} - W < pH < pH_{opt} \\ \hat{q}X_f, & pH > pH_{opt} \end{cases} \quad (S1)$$

where,  $r_{ut}$  indicated the rate of substrate utilization,  $\hat{q}X_f$  indicated the maximum rate of substrate utilization in the biofilm,  $W$  indicated a parameter for pH inhibition, and  $pH_{opt}$  indicated the optimum pH for anode biofilm.

As the microorganism activity was proportional to the substrate utilization rate which was proportional to the current density generated by bioelectrodes, we defined **pH factor** (dimensionless) as the value of  $r_{ut}$  divided by  $\hat{q}X_f$ , thus the pH factor of bioanodes was shown as Eq. S2:

$$\alpha_{pH,a} = \begin{cases} 0, & pH < pH_{opt,a} - W_a \\ \frac{1 + \cos \left( \frac{\pi}{W_a} \cdot (pH - pH_{opt,a}) \right)}{2}, & pH_{opt,a} - W_a \leq pH \leq pH_{opt,a} \\ 1, & pH > pH_{opt,a} \end{cases} \quad (S2)$$

To construct the equation of cathode pH factor, we first experimentally tested the variation of biocathode current under different pH [5]. Then, we modified Eq. S2 according to our experimental data and constructed Eq. S3.

$$\alpha_{pH,c} = \begin{cases} \frac{1 + \cos \left( \frac{\pi}{W_c} \cdot (pH - pH_{opt,c}) \right)}{2}, & pH_{opt,c} - W_c \leq pH \leq pH_{opt,c} + W_c \\ 0, & pH < pH_{opt,c} - W_c \text{ or } pH > pH_{opt,c} + W_c \end{cases} \quad (S3)$$

## Section 5: illustrations of $D_i^{eff}$ and $S_i$

Table S1. Illustrations of the efficient diffusion coefficient and bioelectrochemical source item of species  $i$

| Species $i$  | $S_i$            | $D_i^{eff}$                       |                    | Value of $S_i$ in biofilms |                         |
|--------------|------------------|-----------------------------------|--------------------|----------------------------|-------------------------|
|              |                  | In biofilm                        | In diffusion layer | Anode biofilm              | Cathode biofilm         |
| $CO_2(aq)$   | $S_{CO_2(aq)}$   | $\epsilon_p^{1.5} D_{CO_2(aq)}$   | $D_{CO_2(aq)}$     | 0                          | 0                       |
| $HCO_3^-$    | $S_{HCO_3^-}$    | $\epsilon_p^{1.5} D_{HCO_3^-}$    | $D_{HCO_3^-}$      | 0                          | 0                       |
| $CO_3^{2-}$  | $S_{CO_3^{2-}}$  | $\epsilon_p^{1.5} D_{CO_3^{2-}}$  | $D_{CO_3^{2-}}$    | 0                          | 0                       |
| $OH^-$       | $S_{OH^-}$       | $\epsilon_p^{1.5} D_{OH^-}$       | $D_{OH^-}$         | 0                          | $\frac{i_c}{2FL_{B,c}}$ |
| $H^+$        | $S_{H^+}$        | $\epsilon_p^{1.5} D_{H^+}$        | $D_{H^+}$          | $\frac{7i_a}{8FL_{B,a}}$   | 0                       |
| $H_2PO_4^-$  | $S_{H_2PO_4^-}$  | $\epsilon_p^{1.5} D_{H_2PO_4^-}$  | $D_{H_2PO_4^-}$    | 0                          | 0                       |
| $HPO_4^{2-}$ | $S_{HPO_4^{2-}}$ | $\epsilon_p^{1.5} D_{HPO_4^{2-}}$ | $D_{HPO_4^{2-}}$   | 0                          | 0                       |
| $Ac^-$       | $S_{Ac}$         | $\epsilon_p^{1.5} D_{Ac}$         | $D_{Ac}$           | $-\frac{i_a}{8FL_{B,a}}$   | 0                       |

where  $D_i$  and  $\epsilon_p$  indicate the diffusion coefficient of species  $i$  and the porosity of biofilm, respectively. The efficient diffusion coefficient is calculated according to the Bruggeman mode.

## Section 6: calculation for the resistance of biofilms and solution

The resistance of biofilms is calculated by the following equation:

$$R = \frac{k_{bio}(L_{B,a} + L_{B,c})}{A}$$

where  $k_{bio}$  is the conductivity of the biofilms (the conductivity of the anode biofilm is thought to be equal to that of the cathode biofilm);  $L_{B,a}$  and  $L_{B,c}$  are the thickness of the anode and cathode biofilms, respectively;  $A$  is the area of the electrode.

The resistance of biofilms is calculated by the following equation:

$$R = \frac{k_l L_{Bulk}}{A}$$

where  $k_l$  is the conductivity of the solution;  $L_{Bulk}$  is the distance of the electrodes;  $A$  is the area of the electrode.

## Section 7: variation of pH and acetate concentration during the operation of a CH<sub>4</sub>-producing MES

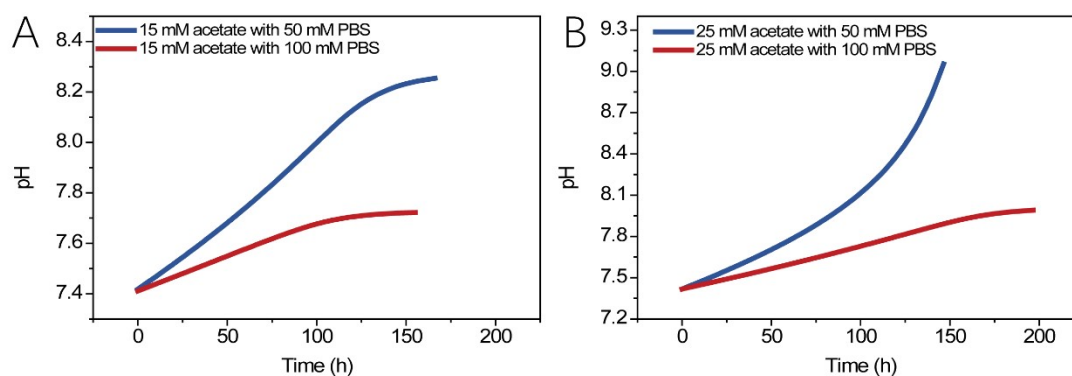

Fig. S3 pH value under typical operation conditions. (A): MESs are operated with 15 mmol L<sup>-1</sup> initial concentration of acetate and 50 or 100 mmol L<sup>-1</sup> PBS; (B): MESs are operated with 25 mmol L<sup>-1</sup> initial concentration of acetate and 50 or 100 mmol L<sup>-1</sup> PBS. mM indicates mmol L<sup>-1</sup>

### Ref.

1. Li, Z., et al., *Polarity reversal facilitates the development of biocathodes in microbial electrosynthesis systems for biogas production*. International Journal of Hydrogen Energy, 2019. **44**(48): p. 26226-26236.
2. Li, J., et al., *Startup cathode potentials determine electron transfer behaviours of biocathodes catalysing CO<sub>2</sub> reduction to CH<sub>4</sub> in microbial electrosynthesis*. Journal of CO<sub>2</sub> Utilization, 2020. **35**: p. 169-175.
3. Fu, Q., et al., *A novel self-adaptive microalgae photobioreactor using anion exchange membranes for continuous supply of nutrients*. Bioresource Technology, 2016. **214**: p. 629-636.
4. Marcus, A.K., C.I. Torres, and B.E. Rittmann, *Analysis of a microbial electrochemical cell using the proton condition in biofilm (PCBIOFILM) model*. Bioresource technology, 2011. **102**(1): p. 253-262.
5. Xiao, S., et al., *Parametric study of biocathodes in microbial electrosynthesis for CO<sub>2</sub> reduction to CH<sub>4</sub> with a direct electron transfer pathway*. Renewable Energy, 2020. **162**: p. 438-446.
